# Supplementary material for: Bulk synthesis of Janus objects and asymmetric patchy particles
Source: Royal Society of Chemistry journal article supplement (doi:10.1039/c2jm31740k), 2012-01-01
Supplement: c2jm31740k.pdf [file c2jm31740k.pdf]

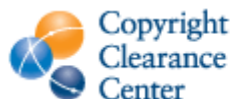

RightsLink®

Home

Account  
Info

Help

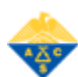

ACS Publications  
High quality. High impact.

Title:

Dielectrophoretic Assembly of  
Metallodielectric Janus Particles  
in AC Electric Fields

Logged in as:

Gabriel Loget

Account #:

3000390031

Author:

Sumit Gangwal et al.

Publication:

Langmuir

LOGOUT

Publisher:

American Chemical Society

Date:

Dec 1, 2008

Copyright © 2008, American Chemical Society

## PERMISSION/LICENSE IS GRANTED FOR YOUR ORDER AT NO CHARGE

This type of permission/license, instead of the standard Terms & Conditions, is sent to you because no fee is being charged for your order. Please note the following:

- Permission is granted for your request in both print and electronic formats, and translations.
- If figures and/or tables were requested, they may be adapted or used in part.
- Please print this page for your records and send a copy of it to your publisher/graduate school.
- Appropriate credit for the requested material should be given as follows: "Reprinted (adapted) with permission from (COMPLETE REFERENCE CITATION). Copyright (YEAR) American Chemical Society." Insert appropriate information in place of the capitalized words.
- One-time permission is granted only for the use specified in your request. No additional uses are granted (such as derivative works or other editions). For any other uses, please submit a new request.

If credit is given to another source for the material you requested, permission must be obtained from that source.

BACK

CLOSE WINDOW

Copyright © 2012 [Copyright Clearance Center, Inc.](#) All Rights Reserved. [Privacy statement.](#)  
Comments? We would like to hear from you. E-mail us at [customercare@copyright.com](mailto:customercare@copyright.com)

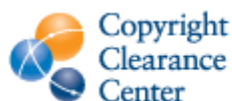

RightsLink®

Home

Account  
Info

Help



ACS Publications  
High quality. High impact.

**Title:** Nanocomposites with Spatially  
Separated Functionalities for  
Combined Imaging and  
Magnetolytic Therapy

Logged in as:  
Gabriel Loget  
Account #:  
3000390031

**Author:** Shang-Hsiu Hu et al.

LOGOUT

**Publication:** Journal of the American  
Chemical Society

**Publisher:** American Chemical Society

**Date:** Jun 1, 2010

Copyright © 2010, American Chemical Society

## PERMISSION/LICENSE IS GRANTED FOR YOUR ORDER AT NO CHARGE

This type of permission/license, instead of the standard Terms & Conditions, is sent to you because no fee is being charged for your order. Please note the following:

- Permission is granted for your request in both print and electronic formats, and translations.
- If figures and/or tables were requested, they may be adapted or used in part.
- Please print this page for your records and send a copy of it to your publisher/graduate school.
- Appropriate credit for the requested material should be given as follows: "Reprinted (adapted) with permission from (COMPLETE REFERENCE CITATION). Copyright (YEAR) American Chemical Society." Insert appropriate information in place of the capitalized words.
- One-time permission is granted only for the use specified in your request. No additional uses are granted (such as derivative works or other editions). For any other uses, please submit a new request.

If credit is given to another source for the material you requested, permission must be obtained from that source.

BACK

CLOSE WINDOW

Copyright © 2012 [Copyright Clearance Center, Inc.](#) All Rights Reserved. [Privacy statement](#).  
Comments? We would like to hear from you. E-mail us at [customercare@copyright.com](mailto:customercare@copyright.com)



RightsLink®

Home

Account  
Info

Help

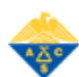

ACS Publications  
High quality. High impact.

Title:

Large Scale Synthesis of Janus  
Submicrometer Sized Colloids by  
Seeded Emulsion Polymerization

Logged in as:

Gabriel Loget

Account #:

3000390031

Author:

Chen Tang et al.

Publication:

Macromolecules

Publisher:

American Chemical Society

Date:

Jun 1, 2010

Copyright © 2010, American Chemical Society

LOGOUT

## PERMISSION/LICENSE IS GRANTED FOR YOUR ORDER AT NO CHARGE

This type of permission/license, instead of the standard Terms & Conditions, is sent to you because no fee is being charged for your order. Please note the following:

- Permission is granted for your request in both print and electronic formats, and translations.
- If figures and/or tables were requested, they may be adapted or used in part.
- Please print this page for your records and send a copy of it to your publisher/graduate school.
- Appropriate credit for the requested material should be given as follows: "Reprinted (adapted) with permission from (COMPLETE REFERENCE CITATION). Copyright (YEAR) American Chemical Society." Insert appropriate information in place of the capitalized words.
- One-time permission is granted only for the use specified in your request. No additional uses are granted (such as derivative works or other editions). For any other uses, please submit a new request.

If credit is given to another source for the material you requested, permission must be obtained from that source.

BACK

CLOSE WINDOW

Copyright © 2012 [Copyright Clearance Center, Inc.](#) All Rights Reserved. [Privacy statement.](#)  
Comments? We would like to hear from you. E-mail us at [customercare@copyright.com](mailto:customercare@copyright.com)



RightsLink®

Home

Account  
Info

Help

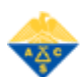

ACS Publications  
High quality. High impact.

**Title:** Orthogonally Dual-Clickable  
Janus Nanoparticles via a Cyclic  
Templating Strategy

**Author:** Shiyi Zhang et al.

**Publication:** Journal of the American  
Chemical Society

**Publisher:** American Chemical Society

**Date:** Jul 1, 2011

Copyright © 2011, American Chemical Society

Logged in as:

Gabriel Loget

Account #:

3000390031

LOGOUT

## PERMISSION/LICENSE IS GRANTED FOR YOUR ORDER AT NO CHARGE

This type of permission/license, instead of the standard Terms & Conditions, is sent to you because no fee is being charged for your order. Please note the following:

- Permission is granted for your request in both print and electronic formats, and translations.
- If figures and/or tables were requested, they may be adapted or used in part.
- Please print this page for your records and send a copy of it to your publisher/graduate school.
- Appropriate credit for the requested material should be given as follows: "Reprinted (adapted) with permission from (COMPLETE REFERENCE CITATION). Copyright (YEAR) American Chemical Society." Insert appropriate information in place of the capitalized words.
- One-time permission is granted only for the use specified in your request. No additional uses are granted (such as derivative works or other editions). For any other uses, please submit a new request.

If credit is given to another source for the material you requested, permission must be obtained from that source.

BACK

CLOSE WINDOW

Copyright © 2012 [Copyright Clearance Center, Inc.](#) All Rights Reserved. [Privacy statement.](#)  
Comments? We would like to hear from you. E-mail us at [customercare@copyright.com](mailto:customercare@copyright.com)



RightsLink®

Home

Account  
Info

Help



ACS Publications  
High quality. High impact.

**Title:** Controlling the Geometry (Janus Balance) of Amphiphilic Colloidal Particles

**Author:** Shan Jiang et al.

**Publication:** Langmuir

**Publisher:** American Chemical Society

**Date:** Mar 1, 2008

Copyright © 2008, American Chemical Society

Logged in as:

Gabriel Loget

Account #:

3000390031

LOGOUT

## PERMISSION/LICENSE IS GRANTED FOR YOUR ORDER AT NO CHARGE

This type of permission/license, instead of the standard Terms & Conditions, is sent to you because no fee is being charged for your order. Please note the following:

- Permission is granted for your request in both print and electronic formats, and translations.
- If figures and/or tables were requested, they may be adapted or used in part.
- Please print this page for your records and send a copy of it to your publisher/graduate school.
- Appropriate credit for the requested material should be given as follows: "Reprinted (adapted) with permission from (COMPLETE REFERENCE CITATION). Copyright (YEAR) American Chemical Society." Insert appropriate information in place of the capitalized words.
- One-time permission is granted only for the use specified in your request. No additional uses are granted (such as derivative works or other editions). For any other uses, please submit a new request.

If credit is given to another source for the material you requested, permission must be obtained from that source.

BACK

CLOSE WINDOW

Copyright © 2012 [Copyright Clearance Center, Inc.](#) All Rights Reserved. [Privacy statement.](#)  
Comments? We would like to hear from you. E-mail us at [customercare@copyright.com](mailto:customercare@copyright.com)



RightsLink®

Home

Account  
Info

Help

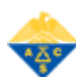

ACS Publications  
High quality. High impact.

**Title:** Solvent-Free Synthesis of Janus  
Colloidal Particles

**Author:** Shan Jiang et al.

**Publication:** Langmuir

**Publisher:** American Chemical Society

**Date:** Sep 1, 2008

Copyright © 2008, American Chemical Society

Logged in as:

Gabriel Loget

Account #:

3000390031

LOGOUT

## PERMISSION/LICENSE IS GRANTED FOR YOUR ORDER AT NO CHARGE

This type of permission/license, instead of the standard Terms & Conditions, is sent to you because no fee is being charged for your order. Please note the following:

- Permission is granted for your request in both print and electronic formats, and translations.
- If figures and/or tables were requested, they may be adapted or used in part.
- Please print this page for your records and send a copy of it to your publisher/graduate school.
- Appropriate credit for the requested material should be given as follows: "Reprinted (adapted) with permission from (COMPLETE REFERENCE CITATION). Copyright (YEAR) American Chemical Society." Insert appropriate information in place of the capitalized words.
- One-time permission is granted only for the use specified in your request. No additional uses are granted (such as derivative works or other editions). For any other uses, please submit a new request.

If credit is given to another source for the material you requested, permission must be obtained from that source.

BACK

CLOSE WINDOW

Copyright © 2012 [Copyright Clearance Center, Inc.](#) All Rights Reserved. [Privacy statement.](#)  
Comments? We would like to hear from you. E-mail us at [customercare@copyright.com](mailto:customercare@copyright.com)



RightsLink®

Home

Account  
Info

Help



ACS Publications  
High quality. High impact.

Title:

Regioselectively Controlled  
Synthesis of Colloidal Mushroom  
Nanostructures and Their Hollow  
Derivatives

Logged in as:

Gabriel Loget

Account #:

3000390031

Author:

Mathias Feyen et al.

LOGOUT

Publication:

Journal of the American  
Chemical Society

Publisher:

American Chemical Society

Date:

May 1, 2010

Copyright © 2010, American Chemical Society

## PERMISSION/LICENSE IS GRANTED FOR YOUR ORDER AT NO CHARGE

This type of permission/license, instead of the standard Terms & Conditions, is sent to you because no fee is being charged for your order. Please note the following:

- Permission is granted for your request in both print and electronic formats, and translations.
- If figures and/or tables were requested, they may be adapted or used in part.
- Please print this page for your records and send a copy of it to your publisher/graduate school.
- Appropriate credit for the requested material should be given as follows: "Reprinted (adapted) with permission from (COMPLETE REFERENCE CITATION). Copyright (YEAR) American Chemical Society." Insert appropriate information in place of the capitalized words.
- One-time permission is granted only for the use specified in your request. No additional uses are granted (such as derivative works or other editions). For any other uses, please submit a new request.

If credit is given to another source for the material you requested, permission must be obtained from that source.

BACK

CLOSE WINDOW

Copyright © 2012 [Copyright Clearance Center, Inc.](#) All Rights Reserved. [Privacy statement](#).  
Comments? We would like to hear from you. E-mail us at [customercare@copyright.com](mailto:customercare@copyright.com)



RightsLink®

Home

Account  
Info

Help



ACS Publications  
High quality. High impact.

**Title:** Reducing the Symmetry of  
Bimetallic Au@Ag Nanoparticles  
by Exploiting Eccentric Polymer  
Shells

Logged in as:  
Gabriel Loget  
Account #:  
3000390031

**Author:** Shuangxi Xing et al.

LOGOUT

**Publication:** Journal of the American  
Chemical Society

**Publisher:** American Chemical Society

**Date:** Jul 1, 2010

Copyright © 2010, American Chemical Society

## PERMISSION/LICENSE IS GRANTED FOR YOUR ORDER AT NO CHARGE

This type of permission/license, instead of the standard Terms & Conditions, is sent to you because no fee is being charged for your order. Please note the following:

- Permission is granted for your request in both print and electronic formats, and translations.
- If figures and/or tables were requested, they may be adapted or used in part.
- Please print this page for your records and send a copy of it to your publisher/graduate school.
- Appropriate credit for the requested material should be given as follows: "Reprinted (adapted) with permission from (COMPLETE REFERENCE CITATION). Copyright (YEAR) American Chemical Society." Insert appropriate information in place of the capitalized words.
- One-time permission is granted only for the use specified in your request. No additional uses are granted (such as derivative works or other editions). For any other uses, please submit a new request.

If credit is given to another source for the material you requested, permission must be obtained from that source.

BACK

CLOSE WINDOW

Copyright © 2012 [Copyright Clearance Center, Inc.](#) All Rights Reserved. [Privacy statement](#).  
Comments? We would like to hear from you. E-mail us at [customercare@copyright.com](mailto:customercare@copyright.com)





RightsLink®

Home

Account  
Info

Help



ACS Publications  
High quality. High impact.

**Title:** A Facile Synthesis of  
Asymmetric Hybrid Colloidal  
Particles

**Author:** Akira Ohnuma et al.

**Publication:** Journal of the American  
Chemical Society

**Publisher:** American Chemical Society

**Date:** Feb 1, 2009

Copyright © 2009, American Chemical Society

Logged in as:

Gabriel Loget

Account #:  
3000390031

LOGOUT

## PERMISSION/LICENSE IS GRANTED FOR YOUR ORDER AT NO CHARGE

This type of permission/license, instead of the standard Terms & Conditions, is sent to you because no fee is being charged for your order. Please note the following:

- Permission is granted for your request in both print and electronic formats, and translations.
- If figures and/or tables were requested, they may be adapted or used in part.
- Please print this page for your records and send a copy of it to your publisher/graduate school.
- Appropriate credit for the requested material should be given as follows: "Reprinted (adapted) with permission from (COMPLETE REFERENCE CITATION). Copyright (YEAR) American Chemical Society." Insert appropriate information in place of the capitalized words.
- One-time permission is granted only for the use specified in your request. No additional uses are granted (such as derivative works or other editions). For any other uses, please submit a new request.

If credit is given to another source for the material you requested, permission must be obtained from that source.

BACK

CLOSE WINDOW

Copyright © 2012 [Copyright Clearance Center, Inc.](#) All Rights Reserved. [Privacy statement.](#)  
Comments? We would like to hear from you. E-mail us at [customercare@copyright.com](mailto:customercare@copyright.com)



RightsLink®

Home

Account  
Info

Help



ACS Publications  
High quality. High impact.

**Title:** Scalable Routes to Janus  
Au–SiO<sub>2</sub> and Ternary  
Ag–Au–SiO<sub>2</sub> Nanoparticles

**Author:** Tao Chen et al.

**Publication:** Chemistry of Materials

**Publisher:** American Chemical Society

**Date:** Jul 1, 2010

Copyright © 2010, American Chemical Society

Logged in as:

Gabriel Loget

Account #:

3000390031

LOGOUT

## PERMISSION/LICENSE IS GRANTED FOR YOUR ORDER AT NO CHARGE

This type of permission/license, instead of the standard Terms & Conditions, is sent to you because no fee is being charged for your order. Please note the following:

- Permission is granted for your request in both print and electronic formats, and translations.
- If figures and/or tables were requested, they may be adapted or used in part.
- Please print this page for your records and send a copy of it to your publisher/graduate school.
- Appropriate credit for the requested material should be given as follows: "Reprinted (adapted) with permission from (COMPLETE REFERENCE CITATION). Copyright (YEAR) American Chemical Society." Insert appropriate information in place of the capitalized words.
- One-time permission is granted only for the use specified in your request. No additional uses are granted (such as derivative works or other editions). For any other uses, please submit a new request.

If credit is given to another source for the material you requested, permission must be obtained from that source.

BACK

CLOSE WINDOW

Copyright © 2012 [Copyright Clearance Center, Inc.](#) All Rights Reserved. [Privacy statement.](#)  
Comments? We would like to hear from you. E-mail us at [customercare@copyright.com](mailto:customercare@copyright.com)



RightsLink®

Home

Account  
Info

Help



ACS Publications  
High quality. High impact.

Title:

Poly(styrene)comb-  
b-Poly(ethylene oxide)comb  
Copolymers: Synthesis and AFM  
Investigation of Intra- and  
Supramolecular Organization as  
Thin Deposits

Logged in as:

Gabriel Loget

Account #:

3000390031

LOGOUT

Author:

David Lanson et al.

Publication:

Macromolecules

Publisher:

American Chemical Society

Date:

Dec 1, 2007

Copyright © 2007, American Chemical Society

### PERMISSION/LICENSE IS GRANTED FOR YOUR ORDER AT NO CHARGE

This type of permission/license, instead of the standard Terms & Conditions, is sent to you because no fee is being charged for your order. Please note the following:

- Permission is granted for your request in both print and electronic formats, and translations.
- If figures and/or tables were requested, they may be adapted or used in part.
- Please print this page for your records and send a copy of it to your publisher/graduate school.
- Appropriate credit for the requested material should be given as follows: "Reprinted (adapted) with permission from (COMPLETE REFERENCE CITATION). Copyright (YEAR) American Chemical Society." Insert appropriate information in place of the capitalized words.
- One-time permission is granted only for the use specified in your request. No additional uses are granted (such as derivative works or other editions). For any other uses, please submit a new request.

If credit is given to another source for the material you requested, permission must be obtained from that source.

BACK

CLOSE WINDOW

Copyright © 2012 [Copyright Clearance Center, Inc.](#) All Rights Reserved. [Privacy statement](#).  
Comments? We would like to hear from you. E-mail us at [customercare@copyright.com](mailto:customercare@copyright.com)



RightsLink®

Home

Account  
Info

Help



ACS Publications  
High quality. High impact.

**Title:** Synthesis of Hollow  
Asymmetrical Silica Dumbbells  
with a Movable Inner Core

**Author:** Daisuke Nagao et al.

**Publication:** Langmuir

**Publisher:** American Chemical Society

**Date:** Apr 1, 2010

Copyright © 2010, American Chemical Society

Logged in as:

Gabriel Loget

Account #:  
3000390031

LOGOUT

## PERMISSION/LICENSE IS GRANTED FOR YOUR ORDER AT NO CHARGE

This type of permission/license, instead of the standard Terms & Conditions, is sent to you because no fee is being charged for your order. Please note the following:

- Permission is granted for your request in both print and electronic formats, and translations.
- If figures and/or tables were requested, they may be adapted or used in part.
- Please print this page for your records and send a copy of it to your publisher/graduate school.
- Appropriate credit for the requested material should be given as follows: "Reprinted (adapted) with permission from (COMPLETE REFERENCE CITATION). Copyright (YEAR) American Chemical Society." Insert appropriate information in place of the capitalized words.
- One-time permission is granted only for the use specified in your request. No additional uses are granted (such as derivative works or other editions). For any other uses, please submit a new request.

If credit is given to another source for the material you requested, permission must be obtained from that source.

BACK

CLOSE WINDOW

Copyright © 2012 [Copyright Clearance Center, Inc.](#) All Rights Reserved. [Privacy statement.](#)  
Comments? We would like to hear from you. E-mail us at [customercare@copyright.com](mailto:customercare@copyright.com)



RightsLink®

Home

Account  
Info

Help



ACS Publications  
High quality. High impact.

**Title:** Janus Discs  
**Author:** Andreas Walther et al.  
**Publication:** Journal of the American  
Chemical Society  
**Publisher:** American Chemical Society  
**Date:** May 1, 2007  
Copyright © 2007, American Chemical Society

Logged in as:  
Gabriel Loget  
Account #:  
3000390031

LOGOUT

## PERMISSION/LICENSE IS GRANTED FOR YOUR ORDER AT NO CHARGE

This type of permission/license, instead of the standard Terms & Conditions, is sent to you because no fee is being charged for your order. Please note the following:

- Permission is granted for your request in both print and electronic formats, and translations.
- If figures and/or tables were requested, they may be adapted or used in part.
- Please print this page for your records and send a copy of it to your publisher/graduate school.
- Appropriate credit for the requested material should be given as follows: "Reprinted (adapted) with permission from (COMPLETE REFERENCE CITATION). Copyright (YEAR) American Chemical Society." Insert appropriate information in place of the capitalized words.
- One-time permission is granted only for the use specified in your request. No additional uses are granted (such as derivative works or other editions). For any other uses, please submit a new request.

If credit is given to another source for the material you requested, permission must be obtained from that source.

BACK

CLOSE WINDOW

Copyright © 2012 [Copyright Clearance Center, Inc.](#) All Rights Reserved. [Privacy statement.](#)  
Comments? We would like to hear from you. E-mail us at [customercare@copyright.com](mailto:customercare@copyright.com)

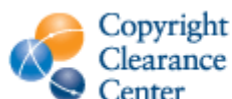

RightsLink®

Home

Account  
Info

Help



ACS Publications  
High quality. High impact.

**Title:** Janus Cylinders  
**Author:** Liu et al.  
**Publication:** Macromolecules  
**Publisher:** American Chemical Society  
**Date:** Oct 1, 2003

Logged in as:  
Gabriel Loget  
Account #:  
3000390031

LOGOUT

Copyright © 2003, American Chemical Society

## PERMISSION/LICENSE IS GRANTED FOR YOUR ORDER AT NO CHARGE

This type of permission/license, instead of the standard Terms & Conditions, is sent to you because no fee is being charged for your order. Please note the following:

- Permission is granted for your request in both print and electronic formats, and translations.
- If figures and/or tables were requested, they may be adapted or used in part.
- Please print this page for your records and send a copy of it to your publisher/graduate school.
- Appropriate credit for the requested material should be given as follows: "Reprinted (adapted) with permission from (COMPLETE REFERENCE CITATION). Copyright (YEAR) American Chemical Society." Insert appropriate information in place of the capitalized words.
- One-time permission is granted only for the use specified in your request. No additional uses are granted (such as derivative works or other editions). For any other uses, please submit a new request.

If credit is given to another source for the material you requested, permission must be obtained from that source.

BACK

CLOSE WINDOW

Copyright © 2012 [Copyright Clearance Center, Inc.](#) All Rights Reserved. [Privacy statement.](#)  
Comments? We would like to hear from you. E-mail us at [customercare@copyright.com](mailto:customercare@copyright.com)

Permission Request Form for non-RSC Material

To request permission to use material from another publisher in your work to be published by The Royal Society of Chemistry, please use this form.

Permissions Editor

Please return the request to gabriel.loget@enscbp.fr

I am preparing the following work for publication:

Journal/Book Title Chemistry of Materials

Title of paper (Journals) Bulk synthesis of Janus objects and asymmetric patchy particles

Chapter title/Fig no (Books)

Editor/Author(s) RSC

to be published by The Royal Society of Chemistry, Thomas Graham House, Science Park, Milton Road, Cambridge CB4 0WF, UK.

I request your permission to include the following material in this and in all subsequent editions of this work to be published by The Royal Society of Chemistry for distribution throughout the world, in all media including electronic and microfilm and to use the material in conjunction with computerbased electronic and information retrieval systems, to grant permissions for photocopying, reproductions and reprints, to translate the material and to publish the translation, and to authorise document delivery and abstracting and indexing services.

Journal/Book Title Soft Matter

Editor/Author(s) A. Walther and A. H. E. Müller

Volume Number 4

Year of Publication 2008

Description of Material Figure 1d  
Page(s) 663-668

The RSC recommends the following style for acknowledgements:

[original citation] – Reproduced by permission of the Royal Society of Chemistry

Due acknowledgement of the original source will be clearly given.

Signed  Date : 5-3-2012

I/we hereby grant permission to use the material requested above.

Signed G. Gokher  
Copyright holder

**PERMISSION GRANTED**

The Royal Society of Chemistry is a  
Signatory to the S.T.M. Guidelines on  
Permissions

The Royal Society of Chemistry (RSC) has a licence from the copyright owner which entitles the RSC to grant this permission. As far as the RSC is aware, the material does not infringe upon the copyright or other rights of anyone.



RightsLink®

Home

Account  
Info

Help



ACS Publications  
High quality. High impact.

**Title:** Janus Micelles†  
**Author:** Rainer Erhardt et al.  
**Publication:** Macromolecules  
**Publisher:** American Chemical Society  
**Date:** Feb 1, 2001

Logged in as:  
Gabriel Loget  
Account #:  
3000390031

LOGOUT

Copyright © 2001, American Chemical Society

## PERMISSION/LICENSE IS GRANTED FOR YOUR ORDER AT NO CHARGE

This type of permission/license, instead of the standard Terms & Conditions, is sent to you because no fee is being charged for your order. Please note the following:

- Permission is granted for your request in both print and electronic formats, and translations.
- If figures and/or tables were requested, they may be adapted or used in part.
- Please print this page for your records and send a copy of it to your publisher/graduate school.
- Appropriate credit for the requested material should be given as follows: "Reprinted (adapted) with permission from (COMPLETE REFERENCE CITATION). Copyright (YEAR) American Chemical Society." Insert appropriate information in place of the capitalized words.
- One-time permission is granted only for the use specified in your request. No additional uses are granted (such as derivative works or other editions). For any other uses, please submit a new request.

If credit is given to another source for the material you requested, permission must be obtained from that source.

BACK

CLOSE WINDOW

Copyright © 2012 [Copyright Clearance Center, Inc.](#) All Rights Reserved. [Privacy statement.](#)  
Comments? We would like to hear from you. E-mail us at [customercare@copyright.com](mailto:customercare@copyright.com)



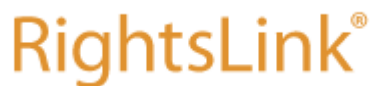[Home](#)[Account Info](#)[Help](#)

**ACS Publications**  
High quality. High impact.

**Title:**

Facile One-Pot Synthesis of Bifunctional Heterodimers of Nanoparticles: A Conjugate of Quantum Dot and Magnetic Nanoparticles

Logged in as:

Gabriel Loget

Account #:

3000390031

[LOGOUT](#)

**Author:**

Hongwei Gu et al.

**Publication:**

Journal of the American Chemical Society

**Publisher:**

American Chemical Society

**Date:**

May 1, 2004

Copyright © 2004, American Chemical Society

### PERMISSION/LICENSE IS GRANTED FOR YOUR ORDER AT NO CHARGE

This type of permission/license, instead of the standard Terms & Conditions, is sent to you because no fee is being charged for your order. Please note the following:

- Permission is granted for your request in both print and electronic formats, and translations.
- If figures and/or tables were requested, they may be adapted or used in part.
- Please print this page for your records and send a copy of it to your publisher/graduate school.
- Appropriate credit for the requested material should be given as follows: "Reprinted (adapted) with permission from (COMPLETE REFERENCE CITATION). Copyright (YEAR) American Chemical Society." Insert appropriate information in place of the capitalized words.
- One-time permission is granted only for the use specified in your request. No additional uses are granted (such as derivative works or other editions). For any other uses, please submit a new request.

If credit is given to another source for the material you requested, permission must be obtained from that source.

[BACK](#)

[CLOSE WINDOW](#)

Copyright © 2012 [Copyright Clearance Center, Inc.](#) All Rights Reserved. [Privacy statement](#).  
Comments? We would like to hear from you. E-mail us at [customercare@copyright.com](mailto:customercare@copyright.com)

**JOHN WILEY AND SONS LICENSE  
TERMS AND CONDITIONS**

May 03, 2012

This is a License Agreement between Gabriel Loget ("You") and John Wiley and Sons ("John Wiley and Sons") provided by Copyright Clearance Center ("CCC"). The license consists of your order details, the terms and conditions provided by John Wiley and Sons, and the payment terms and conditions.

**All payments must be made in full to CCC. For payment instructions, please see information listed at the bottom of this form.**

|                                                                                            |                                                                                         |
|--------------------------------------------------------------------------------------------|-----------------------------------------------------------------------------------------|
| License Number                                                                             | 2901401134052                                                                           |
| License date                                                                               | May 03, 2012                                                                            |
| Licensed content publisher                                                                 | John Wiley and Sons                                                                     |
| Licensed content publication                                                               | Advanced Materials                                                                      |
| Licensed content title                                                                     | Direct observation of chemical reactions in silica-coated gold and silver nanoparticles |
| Licensed content author                                                                    | Paul Mulvaney, Michael Giersig, Thearith Ung, Luis M. Liz-Marzán                        |
| Licensed content date                                                                      | Oct 29, 2004                                                                            |
| Start page                                                                                 | 570                                                                                     |
| End page                                                                                   | 575                                                                                     |
| Type of use                                                                                | Journal                                                                                 |
| Requestor type                                                                             | University/Academic                                                                     |
| Is the reuse sponsored by or associated with a pharmaceutical or medical products company? | no                                                                                      |
| Format                                                                                     | Print and electronic                                                                    |
| Portion                                                                                    | Figure/table                                                                            |
| Number of figures/tables                                                                   | 1                                                                                       |
| Number of extracts                                                                         |                                                                                         |
| Original Wiley figure/table number(s)                                                      | Figure 3                                                                                |
| Will you be translating?                                                                   | No                                                                                      |
| Circulation                                                                                | 100000                                                                                  |
| Order reference number                                                                     |                                                                                         |
| Title of new article                                                                       | Bulk synthesis of Janus objects and asymmetric patchy particles                         |
| Publication the new article is in                                                          | Chemistry of Materials                                                                  |
| Publisher of new article                                                                   | RSC                                                                                     |
| Author of new article                                                                      | Loget Gabriel, Kuhn Alexander                                                           |
| Expected publication date of new article                                                   | Jul 2012                                                                                |
| Estimated size of new article (pages)                                                      | 20                                                                                      |

Total 0.00 EUR

[Terms and Conditions](#)

## TERMS AND CONDITIONS

This copyrighted material is owned by or exclusively licensed to John Wiley & Sons, Inc. or one of its group companies (each a "Wiley Company") or a society for whom a Wiley Company has exclusive publishing rights in relation to a particular journal (collectively WILEY"). By clicking "accept" in connection with completing this licensing transaction, you agree that the following terms and conditions apply to this transaction (along with the billing and payment terms and conditions established by the Copyright Clearance Center Inc., ("CCC's Billing and Payment terms and conditions"), at the time that you opened your Rightslink account (these are available at any time at <http://myaccount.copyright.com>)

### Terms and Conditions

1. The materials you have requested permission to reproduce (the "Materials") are protected by copyright.
2. You are hereby granted a personal, non-exclusive, non-sublicensable, non-transferable, worldwide, limited license to reproduce the Materials for the purpose specified in the licensing process. This license is for a one-time use only with a maximum distribution equal to the number that you identified in the licensing process. Any form of republication granted by this licence must be completed within two years of the date of the grant of this licence (although copies prepared before may be distributed thereafter). The Materials shall not be used in any other manner or for any other purpose. Permission is granted subject to an appropriate acknowledgement given to the author, title of the material/book/journal and the publisher. You shall also duplicate the copyright notice that appears in the Wiley publication in your use of the Material. Permission is also granted on the understanding that nowhere in the text is a previously published source acknowledged for all or part of this Material. Any third party material is expressly excluded from this permission.
3. With respect to the Materials, all rights are reserved. Except as expressly granted by the terms of the license, no part of the Materials may be copied, modified, adapted (except for minor reformatting required by the new Publication), translated, reproduced, transferred or distributed, in any form or by any means, and no derivative works may be made based on the Materials without the prior permission of the respective copyright owner. You may not alter, remove or suppress in any manner any copyright, trademark or other notices displayed by the Materials. You may not license, rent, sell, loan, lease, pledge, offer as security, transfer or assign the Materials, or any of the rights granted to you hereunder to any other person.
4. The Materials and all of the intellectual property rights therein shall at all times remain the exclusive property of John Wiley & Sons Inc or one of its related companies (WILEY) or their respective licensors, and your interest therein is only that of having possession of and the right to reproduce the Materials pursuant to Section 2 herein during the continuance of this Agreement. You agree that you own no right, title or interest in or to the Materials or any of the intellectual property rights therein. You shall have no rights hereunder other than the license as provided for above in Section 2. No right, license or interest to any trademark, trade name, service mark or other branding ("Marks") of WILEY or its licensors is granted hereunder, and you agree that you shall not assert any such right, license or interest with respect thereto.
5. NEITHER WILEY NOR ITS LICENSORS MAKES ANY WARRANTY OR REPRESENTATION OF ANY KIND TO YOU OR ANY THIRD PARTY, EXPRESS, IMPLIED OR STATUTORY, WITH RESPECT TO THE MATERIALS OR THE ACCURACY OF ANY INFORMATION CONTAINED IN THE MATERIALS, INCLUDING, WITHOUT LIMITATION, ANY IMPLIED WARRANTY OF MERCHANTABILITY, ACCURACY, SATISFACTORY QUALITY, FITNESS FOR A PARTICULAR PURPOSE, USABILITY, INTEGRATION OR NON-INFRINGEMENT AND ALL SUCH WARRANTIES ARE HEREBY EXCLUDED BY WILEY AND ITS LICENSORS AND WAIVED BY YOU.
6. WILEY shall have the right to terminate this Agreement immediately upon breach of this Agreement by you.
7. You shall indemnify, defend and hold harmless WILEY, its Licensors and their respective directors, officers, agents and employees, from and against any actual or threatened claims, demands, causes of action or proceedings arising from any breach of this Agreement by you.
8. IN NO EVENT SHALL WILEY OR ITS LICENSORS BE LIABLE TO YOU OR ANY OTHER PARTY OR

ANY OTHER PERSON OR ENTITY FOR ANY SPECIAL, CONSEQUENTIAL, INCIDENTAL, INDIRECT, EXEMPLARY OR PUNITIVE DAMAGES, HOWEVER CAUSED, ARISING OUT OF OR IN CONNECTION WITH THE DOWNLOADING, PROVISIONING, VIEWING OR USE OF THE MATERIALS REGARDLESS OF THE FORM OF ACTION, WHETHER FOR BREACH OF CONTRACT, BREACH OF WARRANTY, TORT, NEGLIGENCE, INFRINGEMENT OR OTHERWISE (INCLUDING, WITHOUT LIMITATION, DAMAGES BASED ON LOSS OF PROFITS, DATA, FILES, USE, BUSINESS OPPORTUNITY OR CLAIMS OF THIRD PARTIES), AND WHETHER OR NOT THE PARTY HAS BEEN ADVISED OF THE POSSIBILITY OF SUCH DAMAGES. THIS LIMITATION SHALL APPLY NOTWITHSTANDING ANY FAILURE OF ESSENTIAL PURPOSE OF ANY LIMITED REMEDY PROVIDED HEREIN.

9. Should any provision of this Agreement be held by a court of competent jurisdiction to be illegal, invalid, or unenforceable, that provision shall be deemed amended to achieve as nearly as possible the same economic effect as the original provision, and the legality, validity and enforceability of the remaining provisions of this Agreement shall not be affected or impaired thereby.

10. The failure of either party to enforce any term or condition of this Agreement shall not constitute a waiver of either party's right to enforce each and every term and condition of this Agreement. No breach under this agreement shall be deemed waived or excused by either party unless such waiver or consent is in writing signed by the party granting such waiver or consent. The waiver by or consent of a party to a breach of any provision of this Agreement shall not operate or be construed as a waiver of or consent to any other or subsequent breach by such other party.

11. This Agreement may not be assigned (including by operation of law or otherwise) by you without WILEY's prior written consent.

12. Any fee required for this permission shall be non-refundable after thirty (30) days from receipt.

13. These terms and conditions together with CCC's Billing and Payment terms and conditions (which are incorporated herein) form the entire agreement between you and WILEY concerning this licensing transaction and (in the absence of fraud) supersedes all prior agreements and representations of the parties, oral or written. This Agreement may not be amended except in writing signed by both parties. This Agreement shall be binding upon and inure to the benefit of the parties' successors, legal representatives, and authorized assigns.

14. In the event of any conflict between your obligations established by these terms and conditions and those established by CCC's Billing and Payment terms and conditions, these terms and conditions shall prevail.

15. WILEY expressly reserves all rights not specifically granted in the combination of (i) the license details provided by you and accepted in the course of this licensing transaction, (ii) these terms and conditions and (iii) CCC's Billing and Payment terms and conditions.

16. This Agreement will be void if the Type of Use, Format, Circulation, or Requestor Type was misrepresented during the licensing process.

17. This Agreement shall be governed by and construed in accordance with the laws of the State of New York, USA, without regards to such state's conflict of law rules. Any legal action, suit or proceeding arising out of or relating to these Terms and Conditions or the breach thereof shall be instituted in a court of competent jurisdiction in New York County in the State of New York in the United States of America and each party hereby consents and submits to the personal jurisdiction of such court, waives any objection to venue in such court and consents to service of process by registered or certified mail, return receipt requested, at the last known address of such party.

### **Wiley Open Access Terms and Conditions**

All research articles published in Wiley Open Access journals are fully open access: immediately freely available to read, download and share. Articles are published under the terms of the [Creative Commons Attribution Non Commercial License](#), which permits use, distribution and reproduction in any medium, provided the original work is properly cited and is not used for commercial purposes. The license is subject to the Wiley Open Access terms and conditions: Wiley Open Access articles are protected by copyright and are posted to repositories and websites in accordance with the terms of the [Creative Commons Attribution Non Commercial License](#). At the time of deposit, Wiley Open Access articles include all changes made during peer review,

copyediting, and publishing. Repositories and websites that host the article are responsible for incorporating any publisher-supplied amendments or retractions issued subsequently.

Wiley Open Access articles are also available without charge on Wiley's publishing platform, **Wiley Online Library** or any successor sites.

### Use by non-commercial users

For non-commercial and non-promotional purposes individual users may access, download, copy, display and redistribute to colleagues Wiley Open Access articles, as well as adapt, translate, text- and data-mine the content subject to the following conditions:

- The authors' moral rights are not compromised. These rights include the right of "paternity" (also known as "attribution" - the right for the author to be identified as such) and "integrity" (the right for the author not to have the work altered in such a way that the author's reputation or integrity may be impugned).
- Where content in the article is identified as belonging to a third party, it is the obligation of the user to ensure that any reuse complies with the copyright policies of the owner of that content.
- If article content is copied, downloaded or otherwise reused for non-commercial research and education purposes, a link to the appropriate bibliographic citation (authors, journal, article title, volume, issue, page numbers, DOI and the link to the definitive published version on Wiley Online Library) should be maintained. Copyright notices and disclaimers must not be deleted.
- Any translations, for which a prior translation agreement with Wiley has not been agreed, must prominently display the statement: "This is an unofficial translation of an article that appeared in a Wiley publication. The publisher has not endorsed this translation."

### Use by commercial "for-profit" organisations

Use of Wiley Open Access articles for commercial, promotional, or marketing purposes requires further explicit permission from Wiley and will be subject to a fee. Commercial purposes include:

- Copying or downloading of articles, or linking to such articles for further redistribution, sale or licensing;
- Copying, downloading or posting by a site or service that incorporates advertising with such content;
- The inclusion or incorporation of article content in other works or services (other than normal quotations with an appropriate citation) that is then available for sale or licensing, for a fee (for example, a compilation produced for marketing purposes, inclusion in a sales pack)
- Use of article content (other than normal quotations with appropriate citation) by for-profit organisations for promotional purposes
- Linking to article content in e-mails redistributed for promotional, marketing or educational purposes;
- Use for the purposes of monetary reward by means of sale, resale, licence, loan, transfer or other form of commercial exploitation such as marketing products
- Print reprints of Wiley Open Access articles can be purchased from:  
[corporatesales@wiley.com](mailto:corporatesales@wiley.com)

Other Terms and Conditions:

BY CLICKING ON THE "I AGREE..." BOX, YOU ACKNOWLEDGE THAT YOU HAVE READ AND FULLY UNDERSTAND EACH OF THE SECTIONS OF AND PROVISIONS SET FORTH IN THIS AGREEMENT AND THAT YOU ARE IN AGREEMENT WITH AND ARE WILLING TO ACCEPT ALL OF YOUR OBLIGATIONS AS SET FORTH IN THIS AGREEMENT.

v1.7

If you would like to pay for this license now, please remit this license along with your payment made payable to "COPYRIGHT CLEARANCE CENTER" otherwise you will be invoiced within 48 hours of the license date. Payment should be in the form of a check or money order referencing your account number and this invoice number RLNK500772658.

Once you receive your invoice for this order, you may pay your invoice by credit card. Please follow instructions provided at that time.

Make Payment To:  
Copyright Clearance Center  
Dept 001  
P.O. Box 843006  
Boston, MA 02284-3006

For suggestions or comments regarding this order, contact RightsLink Customer Support: [customercare@copyright.com](mailto:customercare@copyright.com) or +1-877-622-5543 (toll free in the US) or +1-978-646-2777.

Gratis licenses (referencing \$0 in the Total field) are free. Please retain this printable license for your reference. No payment is required.

---

---

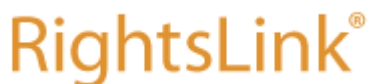[Home](#)[Account Info](#)[Help](#)

ACS Publications  
High quality. High impact.

**Title:**

Facile Route to Morphologically Tailored Silver Patches on Colloidal Particles

**Author:**

Robin N. Klupp Taylor et al.

**Publication:**

Langmuir

**Publisher:**

American Chemical Society

**Date:**

Aug 1, 2010

Copyright © 2010, American Chemical Society

Logged in as:

Gabriel Loget

Account #:

3000390031

[LOGOUT](#)

## PERMISSION/LICENSE IS GRANTED FOR YOUR ORDER AT NO CHARGE

This type of permission/license, instead of the standard Terms & Conditions, is sent to you because no fee is being charged for your order. Please note the following:

- Permission is granted for your request in both print and electronic formats, and translations.
- If figures and/or tables were requested, they may be adapted or used in part.
- Please print this page for your records and send a copy of it to your publisher/graduate school.
- Appropriate credit for the requested material should be given as follows: "Reprinted (adapted) with permission from (COMPLETE REFERENCE CITATION). Copyright (YEAR) American Chemical Society." Insert appropriate information in place of the capitalized words.
- One-time permission is granted only for the use specified in your request. No additional uses are granted (such as derivative works or other editions). For any other uses, please submit a new request.

If credit is given to another source for the material you requested, permission must be obtained from that source.

[BACK](#)[CLOSE WINDOW](#)

Copyright © 2012 [Copyright Clearance Center, Inc.](#) All Rights Reserved. [Privacy statement.](#)  
Comments? We would like to hear from you. E-mail us at [customercare@copyright.com](mailto:customercare@copyright.com)





RightsLink®

Home

Account  
Info

Help



ACS Publications  
High quality. High impact.

**Title:** Self-Guided One-Sided Metal  
Reduction in Te Nanowires  
Leading to Au–Te Matchsticks

Logged in as:  
Gabriel Loget  
Account #:  
3000390031

**Author:** T. P. Vinod et al.

**Publication:** Langmuir

**Publisher:** American Chemical Society

**Date:** Dec 1, 2009

Copyright © 2009, American Chemical Society

LOGOUT

## PERMISSION/LICENSE IS GRANTED FOR YOUR ORDER AT NO CHARGE

This type of permission/license, instead of the standard Terms & Conditions, is sent to you because no fee is being charged for your order. Please note the following:

- Permission is granted for your request in both print and electronic formats, and translations.
- If figures and/or tables were requested, they may be adapted or used in part.
- Please print this page for your records and send a copy of it to your publisher/graduate school.
- Appropriate credit for the requested material should be given as follows: "Reprinted (adapted) with permission from (COMPLETE REFERENCE CITATION). Copyright (YEAR) American Chemical Society." Insert appropriate information in place of the capitalized words.
- One-time permission is granted only for the use specified in your request. No additional uses are granted (such as derivative works or other editions). For any other uses, please submit a new request.

If credit is given to another source for the material you requested, permission must be obtained from that source.

BACK

CLOSE WINDOW

Copyright © 2012 [Copyright Clearance Center, Inc.](#) All Rights Reserved. [Privacy statement.](#)  
Comments? We would like to hear from you. E-mail us at [customercare@copyright.com](mailto:customercare@copyright.com)





RightsLink®

Home

Account  
Info

Help



ACS Publications  
High quality. High impact.

**Title:** Fluorescent Asymmetrically  
Cobalt-Tipped CdSe@CdS  
Core@Shell Nanorod  
Heterostructures Exhibiting  
Room-Temperature  
Ferromagnetic Behavior

Logged in as:  
Gabriel Loget  
Account #:  
3000390031

LOGOUT

**Author:** Sasanka Deka et al.

**Publication:** Journal of the American  
Chemical Society

**Publisher:** American Chemical Society

**Date:** Sep 1, 2009

Copyright © 2009, American Chemical Society

## PERMISSION/LICENSE IS GRANTED FOR YOUR ORDER AT NO CHARGE

This type of permission/license, instead of the standard Terms & Conditions, is sent to you because no fee is being charged for your order. Please note the following:

- Permission is granted for your request in both print and electronic formats, and translations.
- If figures and/or tables were requested, they may be adapted or used in part.
- Please print this page for your records and send a copy of it to your publisher/graduate school.
- Appropriate credit for the requested material should be given as follows: "Reprinted (adapted) with permission from (COMPLETE REFERENCE CITATION). Copyright (YEAR) American Chemical Society." Insert appropriate information in place of the capitalized words.
- One-time permission is granted only for the use specified in your request. No additional uses are granted (such as derivative works or other editions). For any other uses, please submit a new request.

If credit is given to another source for the material you requested, permission must be obtained from that source.

BACK

CLOSE WINDOW

Copyright © 2012 [Copyright Clearance Center, Inc.](#) All Rights Reserved. [Privacy statement](#).  
Comments? We would like to hear from you. E-mail us at [customercare@copyright.com](mailto:customercare@copyright.com)



RightsLink®

Home

Account  
Info

Help



ACS Publications  
High quality. High impact.

**Title:** Dissymmetric Carbon Nanotubes  
by Bipolar Electrochemistry

Logged in as:

Gabriel Loget

**Author:** Chompunuch Warakulwit et al.

Account #:

3000390031

**Publication:** Nano Letters

**Publisher:** American Chemical Society

LOGOUT

**Date:** Feb 1, 2008

Copyright © 2008, American Chemical Society

## PERMISSION/LICENSE IS GRANTED FOR YOUR ORDER AT NO CHARGE

This type of permission/license, instead of the standard Terms & Conditions, is sent to you because no fee is being charged for your order. Please note the following:

- Permission is granted for your request in both print and electronic formats, and translations.
- If figures and/or tables were requested, they may be adapted or used in part.
- Please print this page for your records and send a copy of it to your publisher/graduate school.
- Appropriate credit for the requested material should be given as follows: "Reprinted (adapted) with permission from (COMPLETE REFERENCE CITATION). Copyright (YEAR) American Chemical Society." Insert appropriate information in place of the capitalized words.
- One-time permission is granted only for the use specified in your request. No additional uses are granted (such as derivative works or other editions). For any other uses, please submit a new request.

If credit is given to another source for the material you requested, permission must be obtained from that source.

BACK

CLOSE WINDOW

Copyright © 2012 [Copyright Clearance Center, Inc.](#) All Rights Reserved. [Privacy statement.](#)  
Comments? We would like to hear from you. E-mail us at [customercare@copyright.com](mailto:customercare@copyright.com)

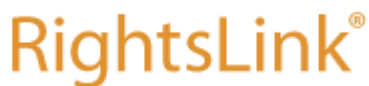[Home](#)[Account Info](#)[Help](#)

ACS Publications  
High quality. High impact.

**Title:**

Versatile Procedure for  
Synthesis of Janus-Type Carbon  
Tubes

Logged in as:

Gabriel Loget

Account #:

3000390031

**Author:**

Gabriel Loget et al.

**Publication:**

Chemistry of Materials

**Publisher:**

American Chemical Society

**Date:**

May 1, 2011

Copyright © 2011, American Chemical Society

[LOGOUT](#)

## PERMISSION/LICENSE IS GRANTED FOR YOUR ORDER AT NO CHARGE

This type of permission/license, instead of the standard Terms & Conditions, is sent to you because no fee is being charged for your order. Please note the following:

- Permission is granted for your request in both print and electronic formats, and translations.
- If figures and/or tables were requested, they may be adapted or used in part.
- Please print this page for your records and send a copy of it to your publisher/graduate school.
- Appropriate credit for the requested material should be given as follows: "Reprinted (adapted) with permission from (COMPLETE REFERENCE CITATION). Copyright (YEAR) American Chemical Society." Insert appropriate information in place of the capitalized words.
- One-time permission is granted only for the use specified in your request. No additional uses are granted (such as derivative works or other editions). For any other uses, please submit a new request.

If credit is given to another source for the material you requested, permission must be obtained from that source.

[BACK](#)

[CLOSE WINDOW](#)

Copyright © 2012 [Copyright Clearance Center, Inc.](#) All Rights Reserved. [Privacy statement.](#)  
Comments? We would like to hear from you. E-mail us at [customercare@copyright.com](mailto:customercare@copyright.com)
